# Supplementary material
Source: PubMed Central journal article supplement (PMC3094047)

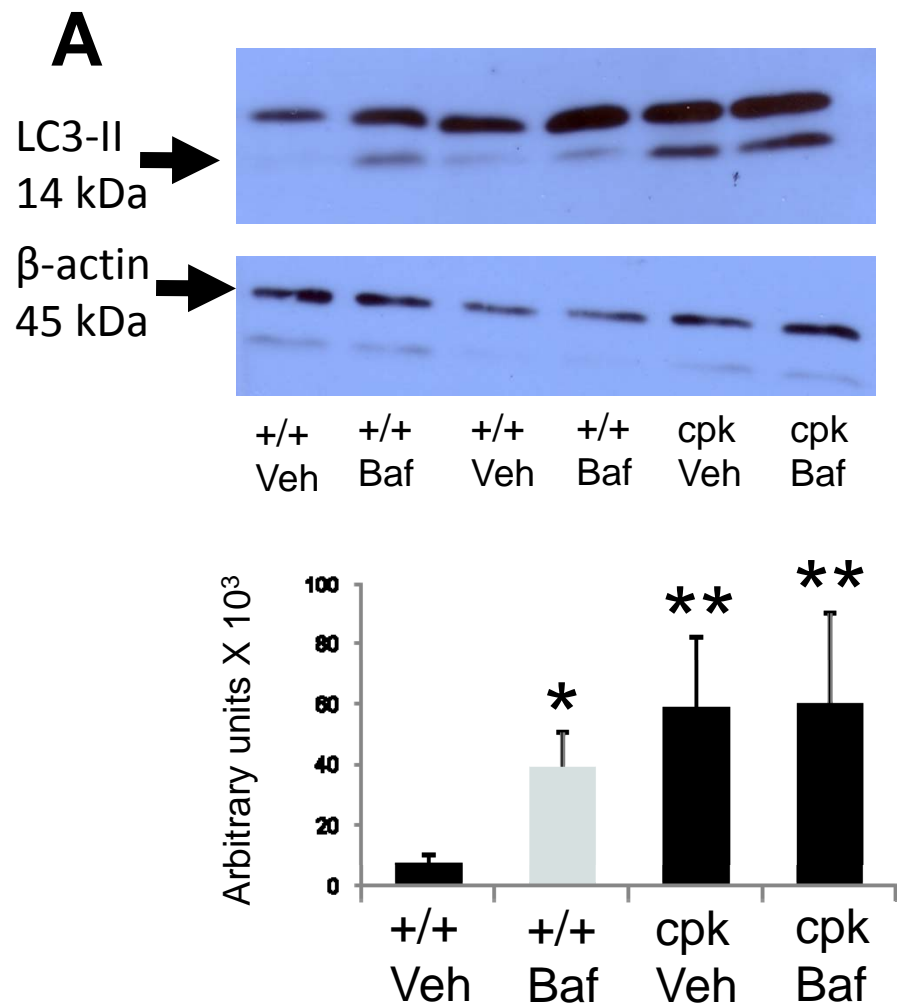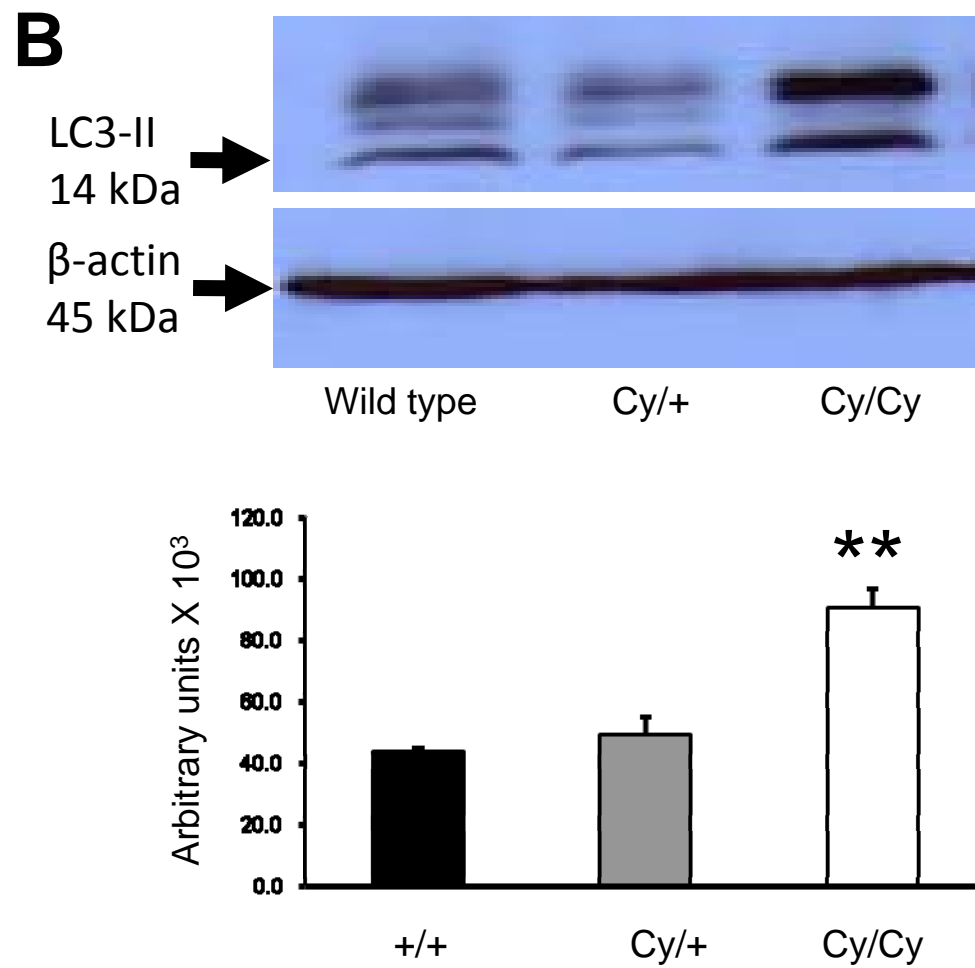

Supplement: supp_00348.2010_RevisedFig3.pdf [file supp_00348.2010_RevisedFig3.pdf]
